# Supplementary material for: Analysis of Porcine Pro- and Anti-Inflammatory Cytokine Induction by S. suis In Vivo and In Vitro
Source: MDPI journal article supplement (doi:10.3390/pathogens9010040), 2020-01-03
Supplement: s1 [file s1]

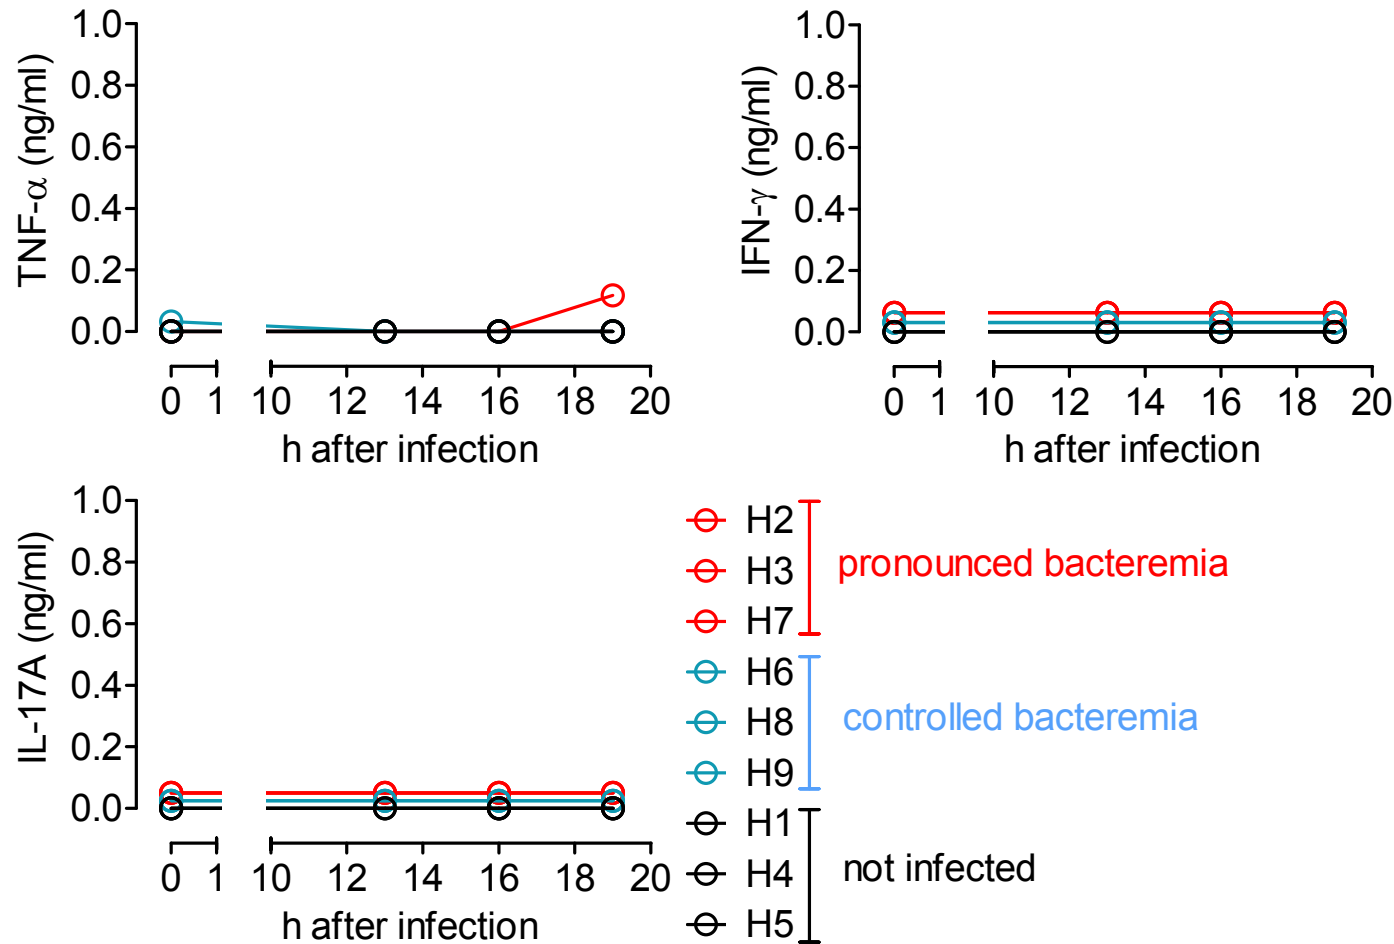

**Figure S1.** Levels of TNF- $\alpha$ , IFN- $\gamma$  and IL-17A in sera of experimentally infected piglets. Cytokine levels in serum measured by ELISA after intravenous infection with *S. suis* strain 10 (*cps2*,  $n=6$ ) and in non-infected control animals ( $n=3$ ). Note that earlier time points than 13 hpi could not be taken due to the experimental setup.
